# Supplementary material for: Serum α-Tocopherol and γ-Tocopherol Concentrations and Prostate Cancer Risk in the PLCO Screening Trial: A Nested Case-Control Study
Source: PLoS One. 2012 Jul 5;7(7):e40204. doi: 10.1371/journal.pone.0040204 (PMC3390343; doi:10.1371/journal.pone.0040204)
Supplement: Table S1 — Observational studies of vitamin E and prostate cancer which stratified on smoking status: selected risk estimates. (XLS) [file pone.0040204.s001.xls]

## Sheet: Sheet1
Supplementary Table S1. Observational studies of vitamin E and prostate cancer which stratified on smoking status: selected risk estimates
Author, publication year (reference)	Study Name and/or Population	Smoking status	# prostate cases/# non-cases (or cohort size)	Exposurea	Results
Eichholzer, 1996 [6]	Basel, Switzerland	32.5% current	30/2974	plasma vitamin E (< 12.9 mg/L vs. > 12.9 mg/L)	RR for mortality =3.26 (95% CI 1.27-8.35), p <0.05 for low vs. high vitamin E in smokers
					RR for mortality=0.76 (95% CI 0.25-2.36) for low vs. high vitamin E in nonsmokers
Chan, 1999 [5]	Health Professionals Follow-up Study	22% (includes current & recent quitters)	1,896 total (522 extraprostatic, 232 metastatic/fatal)/47,780	supplemental vitamin E (> 100 IU/day) vs. none	RR=1.07 (95% CI 0.95-1.20) total prostate cancer
					RR=1.14 (0.82-1.59) for metastatic/fatal prostate cancer
					RR=1.27 (95% CI 0.97-1.66) among current smokers/recent quitters
					RR=0.44 (95% CI 0.18-1.07) for metastatic/fatal cancer among current smokers/recent quitters
Gann, 1999 [7]	Physicians' Health Study	9.1% current, 46.4% former	578/1,294	plasma α-tocopherol (>14.4 vs. < 8.7 mg/L)	OR=1.06 (95% CI 0.76-1.48) all cases
					OR=0.64 (95% CI 0.38-1.07) aggressive cases
					OR=0.51 (95% CI 0.26-0.98) aggressive cases among current/former smokers
Goodman, 2003 [8]	β-Carotene and Retinol Efficacy Trial (CARET)	56% current, 43% former	205/483	serum α-tocopherol (>16.8 vs. < 10.7 mg/L)	OR=0.59 (0.34-1.04), p=0.04
Huang, 2003 [31]	Washinton County, MD
	CLUE 1	24.5% current, 41.2% former	182/364	serum α-tocopherol (> 15.5 vs. < 9.6 mg/L)	OR=0.58 (95% CI 0.31-1.06) all cases; results similar when stratified on smoking status
	CLUE 2	10.9% current, 47.9% former	142/284	serum α-tocopherol (> 17.5 vs. < 10.4 mg/L)	OR=0.78 (95% CI 0.41-1.50) all cases; results similar when stratified on smoking status
Rodriguez, 2004 [12]	Cancer Prevention Study II	7.2-9.7% current, 57.3-59.8% former	4,281/72,704	regular vitamin E supplement use vs. none	RR=1.00 (95% CI 0.93-1.07) all cases
					RR=0.87 (95% CI 0.67-1.11) among current smokers
Weinstein, 2005 [9]	Alpha-Tocopherol, Beta-Carotene Cancer Prevention (ATBC) Study	100% current	100/200	serum α-tocopherol (> 15.8 vs. < 12.6 mg/L)	OR = 0.49 (0.24-1.01) p=0.05
Kirsh, 2006 [26]	Prostate, Lung, Colorectal and Ovarian Cancer Screening Trial (PLCO)	9.8-12.0% current, 50.9-52.3% former	1,338/29,361	supplemental vitamin E (> 400 IU/day) vs. none	RR=0.97 (95% CI 0.83-1.13) all cases
					RR= 0.78 (95% CI 0.52-1.17) among current smokers/recent quitters
					RR=0.91 (95% CI 0.71-1.18) among advanced cases
					RR=0.29 (95% CI 0.12-0.68) advanced cases among current smokers/recent quitters
Stram, 2006 [30]	Multiethnic Cohort	18.1% current, 51.9% former	3,922/78,564	vitamin E intake (> 6.0 vs. < 3.9 mg α-tocopherol equivalent/ 1000 kcal)	RR=1.07 (95% CI 0.97-1.19), p=0.47 all cases; among current smokers only p=0.44 (other data not shown)
				vitamin E supplement use (> 33.75 mg α-tocopherol equivalent/day vs. none)	RR=1.03 (95% CI 0.95-1.12), p=0.56 all cases; among current smokers only p=0.82 (other data not shown)
Weinstein, 2007 [10]	ATBC	100% current	1,732/29,133	serum α-tocopherol (> 14.17 vs. < 9.33 mg/L)	RR=0.80 (95% CI 0.66-0.96), p=0.03 all cases
					RR=0.56 (95% CI 0.36-0.85), p=0.002 for advanced cases
Key, 2007 [28]	European Prospective Investigation into Cancer and Nutrition	28.7% current, 40.1% former	966/1,064	plasma α-tocopherol (> 16.80 vs. < 11.32 mg/L)	RR= 0.82 (95% CI 0.61-1.11) all cases; no effect modification on smoking status (data not shown)
Wright, 2007 [32]	NIH-AARP Diet and Health Study	9.1-11.9% current, 59.1-62.8% former	10,241/295,344	supplemental vitamin E (> 800 IU/day) vs. none	RR=0.97 (95% CI 0.87-1.07) all cases
					RR=0.86 (95% CI 0.65-1.13) among advanced cases
					RR=1.15 (95% CI 0.81-1.63) among current smokers
					RR=0.91 (95% CI 0.80-1.04) among former smokers
					RR=1.04 (95% CI 0.86-1.25) among nonsmokers
Peters, 2008 [27]	Vitamins and Lifestyle Study	13.5-20.6 % current & recent quitters	830/35,242	10-year average supplemental vitamin E (> 400 IU/day) vs. none	HR=0.86 (0.65-1.1) all cases
					HR=0.43 (95% CI 0.19-1.1) among advanced cases
					HR=0.69 (95% CI 0.43-1.1) among never smokers
					HR=0.79 (95% CI 0.53-1.2) among former smokers
					HR=1.8 (95% CI 0.84-3.7) among current smokers/recent quitters
Watters, 2009 [11]	ATBC	100% current	1,891 cases/395 prostate cancer deaths/29,133	serum α-tocopherol (>14.0 vs. < 9.4 mg/L)	HR=0.67 (95% CI 0.45-1.00), p=0.03 for prostate cancer mortality
Gill, 2009 [29]	Multiethnic Cohort	not reported	467/936	serum α-tocopherol (median of 25.1 vs. median of 9.0 mg/L)	OR=0.95 (95% CI 0.65-1.39) all cases; no effect modification on smoking status (data not shown)
Cheng, 2011 [13]	CARET	52.8% current, 47.2% former (includes <2% never)	684/1,441	serum α-tocopherol (>16.0 vs. < 9.9 mg/L)	OR=0.82 (95% CI 0.61-1.10), p=0.06 for all cases
					OR=0.62 (95% CI 0.40-0.96), p=0.008 among current smokers
					OR=0.73 (95% CI 0.47-1.11) p=0.04 for aggressive disease
Weinstein, 2012	PLCO	9.2% current, 8.4% recent quitters	680/824	serum α-tocopherol (>24.5 vs. < 12.3 mg/L)	OR=0.63 (95% CI 0.44-0.92), p=0.05 for all cases
					OR=0.39 (95% CI 0.14-1.04), p=0.06 among current smokers and recent quitters
					OR=0.65 (95% CI 0.39-1.07), p=0.19 for aggressive disease
a all serum and plasma α-tocopherol values were convereted to mg/L by dividing values presented as µmolL by 2.322
