# Supplementary material for: Serum α-Tocopherol and γ-Tocopherol Concentrations and Prostate Cancer Risk in the PLCO Screening Trial: A Nested Case-Control Study
Source: PLoS One. 2012 Jul 5;7(7):e40204. doi: 10.1371/journal.pone.0040204 (PMC3390343; doi:10.1371/journal.pone.0040204)
Supplement: Table S2 — Randomized controlled intervention trials which examined vitamin E and prostate cancer. (XLS) [file pone.0040204.s002.xls]

## Sheet: Sheet1
Supplementary Table S2. Randomized controlled intervention trials which examined vitamin E and prostate cancer
Trial, publication year (reference)	Population: n	Age range (years)	Prostate cancer screen requirement?	% Current smokers	Dose/formulation	# cases	Stage at diagnosis	Results
ATBC Trial, 1998 [1, 43]	Male Finnish smokers: 29,133	50-69	no	1	50 mg (50 IU) all rac-α-tocopheryl acetate, daily	246	22% stage 0-1; 78% stage 2-4	In the α-tocopherol arm: 32% decreased incidence overall; 40% decreased incidence of stage 2-4 tumors, 41% decreased mortality
Heart Protection Study, 2002 [46]	Men and women with a history of heart disease or diabetes mellitus from the United Kingdom: 15,454 men	40-80	no	~25%	600 mg synthetic vitamin E (along with 250 mg vitamin C and 20 mg beta-carotene), daily	290	not reported	138 prostate cancers (1.8%) in participants randomized to receive the vitamins and 152 (2.0%) in placebo (p=0.4)
HOPE, 2005 [45]	Men and women with vascular disease or diabetes mellitus from Canada, the United States, western Europe, Argentina, Brazil and Mexico: 6,996 men	55+	no	~14%	400 IU RRR-α-tocopheryl acetate from natural sources, daily	235	not reported	Prostate cancer incidence: OR= 0.98 (95% CI 0.76-1.26), p=0.86 in the α-tocopherol vs. placebo arm
SU.VI.MAX, 2005 [44]	French men and women, disease-free: 5,141 men	45-60	no	0.15	30 mg α-tocopherol (along with 120 mg vitamin C, 6 mg beta-carotene, 100 ug selenium, 20 mg zinc), daily	103	not reported	HR=0.88 (95% CI 0.60-1.29) in the supplementation vs. placebo arm; HR=0.52 ( 95% CI 0.29-0.92) in the supplementation vs. placebo arm among men with normal PSA at baseline (over 90% of the trial population)
SELECT, 2009 & 2011 [2,3]	Healthy men from the United States, Canada, and Puerto Rico: 35,533	55+ (50+ for African-Americans)	yes, PSA < 4 ng/ml and a DRE not suspicious for cancer; additionally, 83%-86% reported yearly PSA testing	0.08	400 IU all rac-α-tocopheryl acetate, daily	1,758 [2] 2,279 [3]	approximately 1.1% advanced cases [46]	HR=1.13 (99% CI 0.95-1.35) in the α-tocopherol vs. placebo arm, 1.05 (99% CI 0.88-1.25) in the selenium + α-tocopherol vs. placebo arm [2]; HR=1.17 (99% CI 1.004-1.36) in the α-tocopherol vs. placebo arm, 1.05 (99% CI 0.89-1.22) in the selenium + α-tocopherol vs. placebo arm [3]
PHS-II, 2009 [4]	U.S. male physicians: 14,641	50+	no	0.04	400 IU synthetic α-tocophol, alternate days	1008	not reported, but fewer than expected advanced cases occurred [46]	HR= 0.97 (95% CI 0.85-1.09) in the α-tocopherol vs. placebo arm
